# Supplementary material for: Biogeochemical layering and transformation of particulate organic carbon in the Tropical Northwestern Pacific Ocean inferred from δ 13 C
Source: Copernicus journal article supplement (doi:10.5194/os-21-1627-2025), 2025-07-31
Supplement: Supplementary file 1 [file os-21-1627-2025-supplement.pdf]

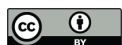

*Supplement of*

**Biogeochemical layering and transformation of particulate organic carbon in the Tropical Northwestern Pacific Ocean inferred from  $\delta^{13}\text{C}$**

**Detong Tian et al.**

*Correspondence to:* Xuegang Li (lixuegang@qdio.ac.cn) and Jinming Song (jmsong@qdio.ac.cn)

The copyright of individual parts of the supplement might differ from the article licence.

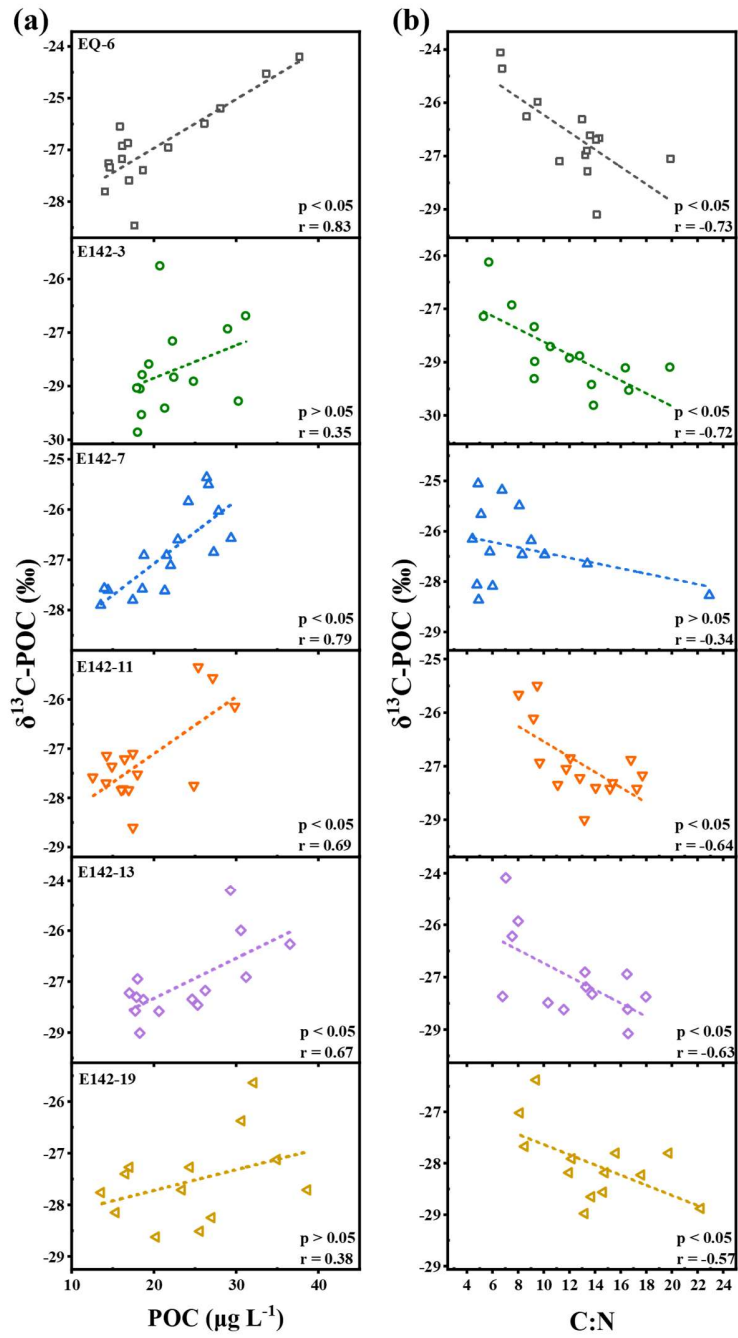

Figure S1. Relationships between  $\delta^{13}\text{C-POC}$  and (a) POC concentration and (b) C:N ratio across sampling stations.
